# Supplementary material
Source: PubMed Central journal article supplement (PMC7820916)
Supplement: mmc1.pdf [file mmc1.pdf]

Sallam *et al.*, Temporal increase in D614G mutation of SARS-CoV-2 in the Middle East and North Africa: Phylogenetic and mutation analysis study

## Appendix S1

A complete list of the MENA SARS-CoV-2 sequence epi accession numbers that were analyzed in this study. These sequences are available publicly for registered users of the global science initiative and primary source for genomic data of influenza viruses (GISAID) [1,2].

|              |              |              |              |              |
|--------------|--------------|--------------|--------------|--------------|
| EPIISL469277 | EPIISL479687 | EPIISL459976 | EPIISL492020 | EPIISL437739 |
| EPIISL435137 | EPIISL479688 | EPIISL459971 | EPIISL492021 | EPIISL437740 |
| EPIISL435134 | EPIISL479689 | EPIISL459969 | EPIISL492022 | EPIISL437741 |
| EPIISL435121 | EPIISL479690 | EPIISL459972 | EPIISL492023 | EPIISL437742 |
| EPIISL435126 | EPIISL479691 | EPIISL459973 | EPIISL492024 | EPIISL437743 |
| EPIISL435131 | EPIISL479692 | EPIISL459974 | EPIISL492025 | EPIISL437744 |
| EPIISL435135 | EPIISL479693 | EPIISL459975 | EPIISL492026 | EPIISL437745 |
| EPIISL435138 | EPIISL479694 | EPIISL459965 | EPIISL457701 | EPIISL437746 |
| EPIISL435139 | EPIISL479695 | EPIISL469049 | EPIISL457704 | EPIISL437747 |
| EPIISL435129 | EPIISL479696 | EPIISL469052 | EPIISL457706 | EPIISL437748 |
| EPIISL435133 | EPIISL479697 | EPIISL469053 | EPIISL457974 | EPIISL437749 |
| EPIISL435136 | EPIISL479698 | EPIISL471456 | EPIISL457937 | EPIISL437750 |
| EPIISL435119 | EPIISL479699 | EPIISL469054 | EPIISL457938 | EPIISL437751 |
| EPIISL435123 | EPIISL479700 | EPIISL469051 | EPIISL457939 | EPIISL437752 |
| EPIISL435130 | EPIISL479701 | EPIISL459984 | EPIISL457975 | EPIISL437753 |
| EPIISL435140 | EPIISL479702 | EPIISL471457 | EPIISL457976 | EPIISL489996 |
| EPIISL435141 | EPIISL479703 | EPIISL469017 | EPIISL457977 | EPIISL489997 |
| EPIISL435120 | EPIISL479704 | EPIISL491137 | EPIISL457978 | EPIISL489998 |
| EPIISL435122 | EPIISL479705 | EPIISL491158 | EPIISL457979 | EPIISL489999 |
| EPIISL435142 | EPIISL479706 | EPIISL491167 | EPIISL457980 | EPIISL490000 |
| EPIISL435127 | EPIISL479707 | EPIISL491129 | EPIISL457985 | EPIISL490001 |
| EPIISL435128 | EPIISL479708 | EPIISL491151 | EPIISL457986 | EPIISL490002 |
| EPIISL435132 | EPIISL479709 | EPIISL491139 | EPIISL457987 | EPIISL490003 |
| EPIISL435124 | EPIISL479711 | EPIISL458121 | EPIISL457988 | EPIISL490004 |
| EPIISL435125 | EPIISL479713 | EPIISL491168 | EPIISL457989 | EPIISL490005 |
| EPIISL435143 | EPIISL479714 | EPIISL491130 | EPIISL457990 | EPIISL490006 |
| EPIISL469278 | EPIISL479715 | EPIISL491162 | EPIISL457991 | EPIISL490007 |
| EPIISL469276 | EPIISL479717 | EPIISL491163 | EPIISL457992 | EPIISL490008 |
| EPIISL469280 | EPIISL479718 | EPIISL491171 | EPIISL457993 | EPIISL490009 |
| EPIISL469281 | EPIISL479719 | EPIISL491143 | EPIISL457707 | EPIISL490010 |
| EPIISL463740 | EPIISL479720 | EPIISL491164 | EPIISL457703 | EPIISL490011 |
| EPIISL469279 | EPIISL479721 | EPIISL491165 | EPIISL457994 | EPIISL490012 |
| EPIISL487270 | EPIISL479722 | EPIISL491125 | EPIISL457995 | EPIISL416432 |
| EPIISL487272 | EPIISL479723 | EPIISL491140 | EPIISL491116 | EPIISL416521 |
| EPIISL485401 | EPIISL479724 | EPIISL491142 | EPIISL457997 | EPIISL416522 |
| EPIISL486887 | EPIISL479725 | EPIISL458126 | EPIISL457998 | EPIISL469241 |
| EPIISL486888 | EPIISL479726 | EPIISL491126 | EPIISL491154 | EPIISL469242 |

|              |              |              |              |              |
|--------------|--------------|--------------|--------------|--------------|
| EPIISL486889 | EPIISL479727 | EPIISL491131 | EPIISL457996 | EPIISL469243 |
| EPIISL487274 | EPIISL479728 | EPIISL491146 | EPIISL491134 | EPIISL469244 |
| EPIISL487273 | EPIISL479731 | EPIISL491127 | EPIISL491121 | EPIISL469245 |
| EPIISL483547 | EPIISL479733 | EPIISL491132 | EPIISL491135 | EPIISL469247 |
| EPIISL483542 | EPIISL479735 | EPIISL491166 | EPIISL457981 | EPIISL469248 |
| EPIISL483543 | EPIISL430819 | EPIISL491136 | EPIISL491128 | EPIISL469249 |
| EPIISL483545 | EPIISL430820 | EPIISL491133 | EPIISL458127 | EPIISL469250 |
| EPIISL483548 | EPIISL475745 | EPIISL457984 | EPIISL458123 | EPIISL469251 |
| EPIISL483546 | EPIISL475746 | EPIISL491124 | EPIISL491161 | EPIISL469252 |
| EPIISL483544 | EPIISL475747 | EPIISL491122 | EPIISL458122 | EPIISL437468 |
| EPIISL483549 | EPIISL475748 | EPIISL458116 | EPIISL491155 | EPIISL437459 |
| EPIISL483550 | EPIISL475749 | EPIISL458118 | EPIISL491147 | EPIISL437460 |
| EPIISL483551 | EPIISL475750 | EPIISL491170 | EPIISL458125 | EPIISL437461 |
| EPIISL483552 | EPIISL475751 | EPIISL457983 | EPIISL491149 | EPIISL437462 |
| EPIISL483553 | EPIISL475752 | EPIISL458124 | EPIISL491150 | EPIISL437463 |
| EPIISL483554 | EPIISL475753 | EPIISL458128 | EPIISL491156 | EPIISL437464 |
| EPIISL483556 | EPIISL424349 | EPIISL491169 | EPIISL491157 | EPIISL437465 |
| EPIISL483562 | EPIISL442044 | EPIISL491145 | EPIISL491160 | EPIISL437466 |
| EPIISL483640 | EPIISL437512 | EPIISL491141 | EPIISL458119 | EPIISL437467 |
| EPIISL483565 | EPIISL445088 | EPIISL457705 | EPIISL457702 | EPIISL437469 |
| EPIISL483555 | EPIISL442523 | EPIISL491153 | EPIISL491159 | EPIISL437470 |
| EPIISL483557 | EPIISL429993 | EPIISL458117 | EPIISL491152 | EPIISL437471 |
| EPIISL483558 | EPIISL429997 | EPIISL491968 | EPIISL457982 | EPIISL437472 |
| EPIISL483559 | EPIISL430002 | EPIISL491969 | EPIISL458120 | EPIISL437473 |
| EPIISL483560 | EPIISL430003 | EPIISL491970 | EPIISL458137 | EPIISL437474 |
| EPIISL483561 | EPIISL429994 | EPIISL491971 | EPIISL491123 | EPIISL437482 |
| EPIISL483563 | EPIISL429999 | EPIISL491972 | EPIISL491144 | EPIISL437483 |
| EPIISL483564 | EPIISL430001 | EPIISL491138 | EPIISL491148 | EPIISL437484 |
| EPIISL483639 | EPIISL430004 | EPIISL491974 | EPIISL427404 | EPIISL437485 |
| EPIISL418241 | EPIISL430014 | EPIISL491975 | EPIISL427405 | EPIISL437486 |
| EPIISL420037 | EPIISL430007 | EPIISL491976 | EPIISL427406 | EPIISL437487 |
| EPIISL418242 | EPIISL430011 | EPIISL491977 | EPIISL427408 | EPIISL437488 |
| EPIISL482775 | EPIISL429996 | EPIISL491978 | EPIISL427416 | EPIISL437489 |
| EPIISL482760 | EPIISL430006 | EPIISL491979 | EPIISL427417 | EPIISL437490 |
| EPIISL482759 | EPIISL430015 | EPIISL491980 | EPIISL427418 | EPIISL437491 |
| EPIISL483035 | EPIISL430005 | EPIISL491981 | EPIISL437715 | EPIISL437492 |
| EPIISL482761 | EPIISL429998 | EPIISL491982 | EPIISL437716 | EPIISL437493 |
| EPIISL482765 | EPIISL430000 | EPIISL491983 | EPIISL437717 | EPIISL437494 |
| EPIISL469275 | EPIISL430009 | EPIISL491984 | EPIISL437700 | EPIISL437495 |
| EPIISL468044 | EPIISL430012 | EPIISL491985 | EPIISL437701 | EPIISL437475 |
| EPIISL468045 | EPIISL450188 | EPIISL491986 | EPIISL437702 | EPIISL437496 |
| EPIISL468046 | EPIISL450186 | EPIISL491987 | EPIISL437703 | EPIISL437497 |
| EPIISL468047 | EPIISL450187 | EPIISL491988 | EPIISL437704 | EPIISL437754 |
| EPIISL468048 | EPIISL416541 | EPIISL491989 | EPIISL437705 | EPIISL437755 |
| EPIISL468049 | EPIISL416542 | EPIISL491990 | EPIISL437706 | EPIISL437756 |
| EPIISL468050 | EPIISL416543 | EPIISL491991 | EPIISL437707 | EPIISL437757 |
| EPIISL468051 | EPIISL416458 | EPIISL491992 | EPIISL437708 | EPIISL437758 |
| EPIISL468052 | EPIISL422424 | EPIISL491994 | EPIISL437709 | EPIISL437759 |
| EPIISL468053 | EPIISL422426 | EPIISL491993 | EPIISL437710 | EPIISL437760 |
| EPIISL468054 | EPIISL422427 | EPIISL491995 | EPIISL437711 | EPIISL437761 |

|              |              |              |              |              |
|--------------|--------------|--------------|--------------|--------------|
| EPIISL468056 | EPIISL450512 | EPIISL491996 | EPIISL437712 | EPIISL437762 |
| EPIISL468057 | EPIISL450508 | EPIISL491997 | EPIISL437713 | EPIISL437691 |
| EPIISL468058 | EPIISL450511 | EPIISL491998 | EPIISL437714 | EPIISL437692 |
| EPIISL468059 | EPIISL450515 | EPIISL491999 | EPIISL437718 | EPIISL437693 |
| EPIISL468060 | EPIISL450514 | EPIISL492000 | EPIISL437719 | EPIISL437694 |
| EPIISL468062 | EPIISL450509 | EPIISL492001 | EPIISL437720 | EPIISL437695 |
| EPIISL482762 | EPIISL459982 | EPIISL492002 | EPIISL437721 | EPIISL437476 |
| EPIISL482763 | EPIISL471458 | EPIISL492003 | EPIISL437722 | EPIISL437477 |
| EPIISL482764 | EPIISL471459 | EPIISL492004 | EPIISL437723 | EPIISL437478 |
| EPIISL482773 | EPIISL471460 | EPIISL492005 | EPIISL437724 | EPIISL437479 |
| EPIISL482772 | EPIISL459979 | EPIISL492006 | EPIISL437725 | EPIISL437696 |
| EPIISL483036 | EPIISL459980 | EPIISL492007 | EPIISL437726 | EPIISL437697 |
| EPIISL482771 | EPIISL459981 | EPIISL492008 | EPIISL437727 | EPIISL437698 |
| EPIISL482766 | EPIISL459978 | EPIISL492009 | EPIISL437728 | EPIISL437699 |
| EPIISL482767 | EPIISL459977 | EPIISL492010 | EPIISL437729 | EPIISL463001 |
| EPIISL482770 | EPIISL459983 | EPIISL492011 | EPIISL437730 | EPIISL458285 |
| EPIISL482769 | EPIISL451400 | EPIISL492012 | EPIISL437731 | EPIISL458286 |
| EPIISL483037 | EPIISL458287 | EPIISL492013 | EPIISL437732 | EPIISL463005 |
| EPIISL483038 | EPIISL476025 | EPIISL492014 | EPIISL437733 | EPIISL463002 |
| EPIISL482768 | EPIISL476026 | EPIISL492015 | EPIISL437734 | EPIISL463003 |
| EPIISL482774 | EPIISL458150 | EPIISL492016 | EPIISL437735 | EPIISL463006 |
| EPIISL477161 | EPIISL467299 | EPIISL492017 | EPIISL437736 | EPIISL463004 |
| EPIISL478672 | EPIISL476559 | EPIISL492018 | EPIISL437737 |              |
| EPIISL479686 | EPIISL459966 | EPIISL492019 | EPIISL437738 |              |

## References

1. Shu, Y.; McCauley, J. GISAID: Global initiative on sharing all influenza data - from vision to reality. *Euro surveillance : bulletin Europeen sur les maladies transmissibles = European communicable disease bulletin* **2017**, *22*, doi:10.2807/1560-7917.ES.2017.22.13.30494.
2. Elbe, S.; Buckland-Merrett, G. Data, disease and diplomacy: GISAID's innovative contribution to global health. *Global challenges* **2017**, *1*, 33-46, doi:10.1002/gch2.1018.
